# Supplementary material for: Homoleptic 1-D iron selenolate complexes—synthesis, structure, magnetic and thermal behaviour of 1∞[Fe(SeR)2] (R = Ph, Mes)
Source: Royal Society of Chemistry journal article supplement (doi:10.1039/c1dt10089k), 2011-01-01
Supplement: c1dt10089k.pdf [file c1dt10089k.pdf]

## Supporting information

### **Homoleptic 1-D Iron Selenolate Complexes — Synthesis, Structure, Magnetic and Thermal Behaviour of $\infty[\text{Fe}(\text{SeR})_2]$ (R = Ph, Mes)\*\***

Andreas Eichhöfer<sup>[a]\*</sup>, Gernot Buth<sup>[b]</sup>, Francesco Dolci<sup>[c]</sup>, Karin Fink<sup>[a]</sup>, Richard. A. Mole<sup>[d]</sup>,  
Paul T. Wood<sup>[e]</sup>

[a] Institut für Nanotechnologie and [b] Institut für Synchrotronstrahlung; Karlsruhe Institut für Technologie (KIT) Postfach 364076021 Karlsruhe (Germany)

[c] European Commission - JRC Institute for Energy Cleaner Energy Unit, Westerduinweg 3, NL-1755 ZG Petten, The Netherlands

[d] ZWE FRM-II, Lichtenbergstrasse 1, 85747 Garching, Germany

[e] University Chemical Laboratory, Lensfield Rd., Cambridge CB2 1EW (UK)

\*\* (Ph = phenyl = C<sub>6</sub>H<sub>5</sub>, Mes = mesityl = C<sub>6</sub>H<sub>2</sub>-2,4,6-(CH<sub>3</sub>)<sub>3</sub>)

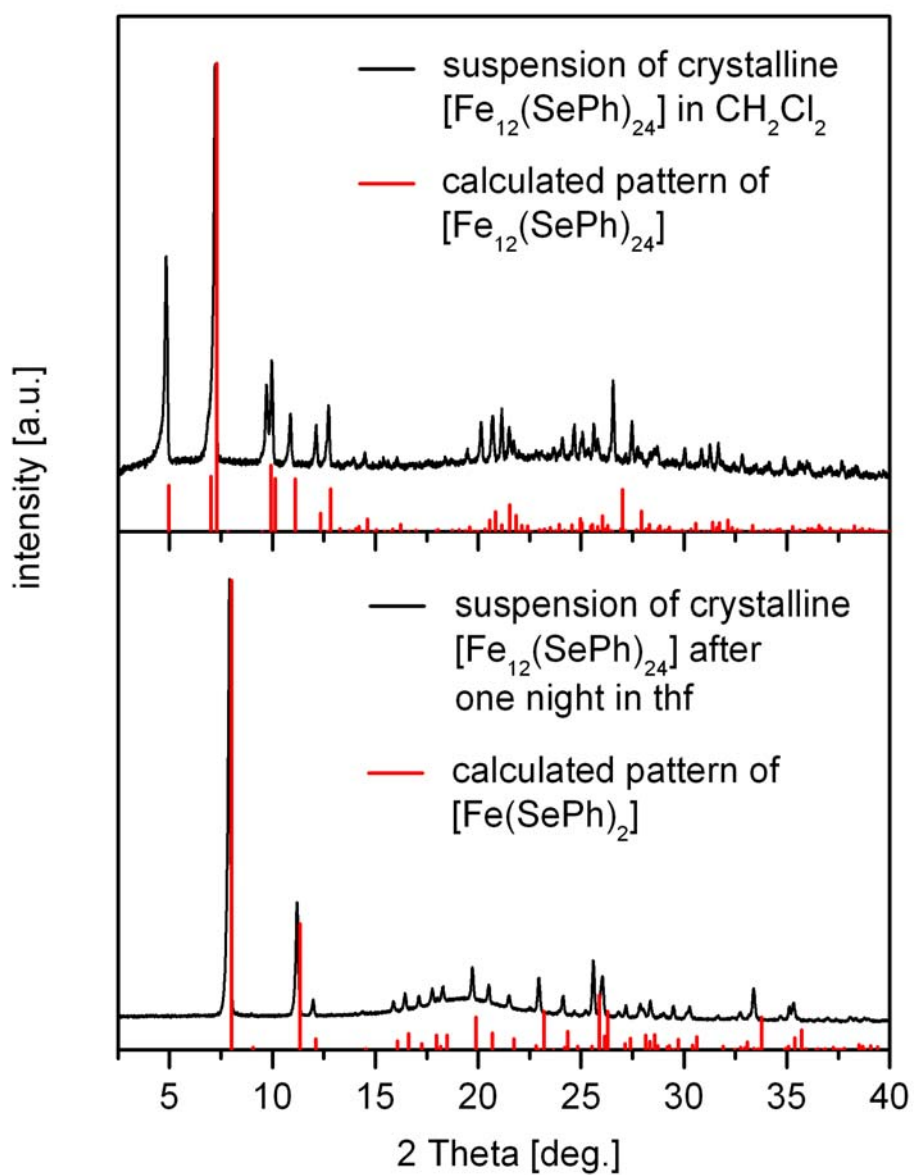

Figure S1. Measured (black) and simulated (red) X-ray powder patterns of  $[\text{Fe}(\text{SePh})_2]_{12}$  as a suspension of fresh crystals in  $\text{CH}_2\text{Cl}_2$  (up) and as a suspension of crystals after one night in thf compared with the calculated pattern of  $\infty [\text{Fe}(\text{SePh})_2]$  (**1**) (down).

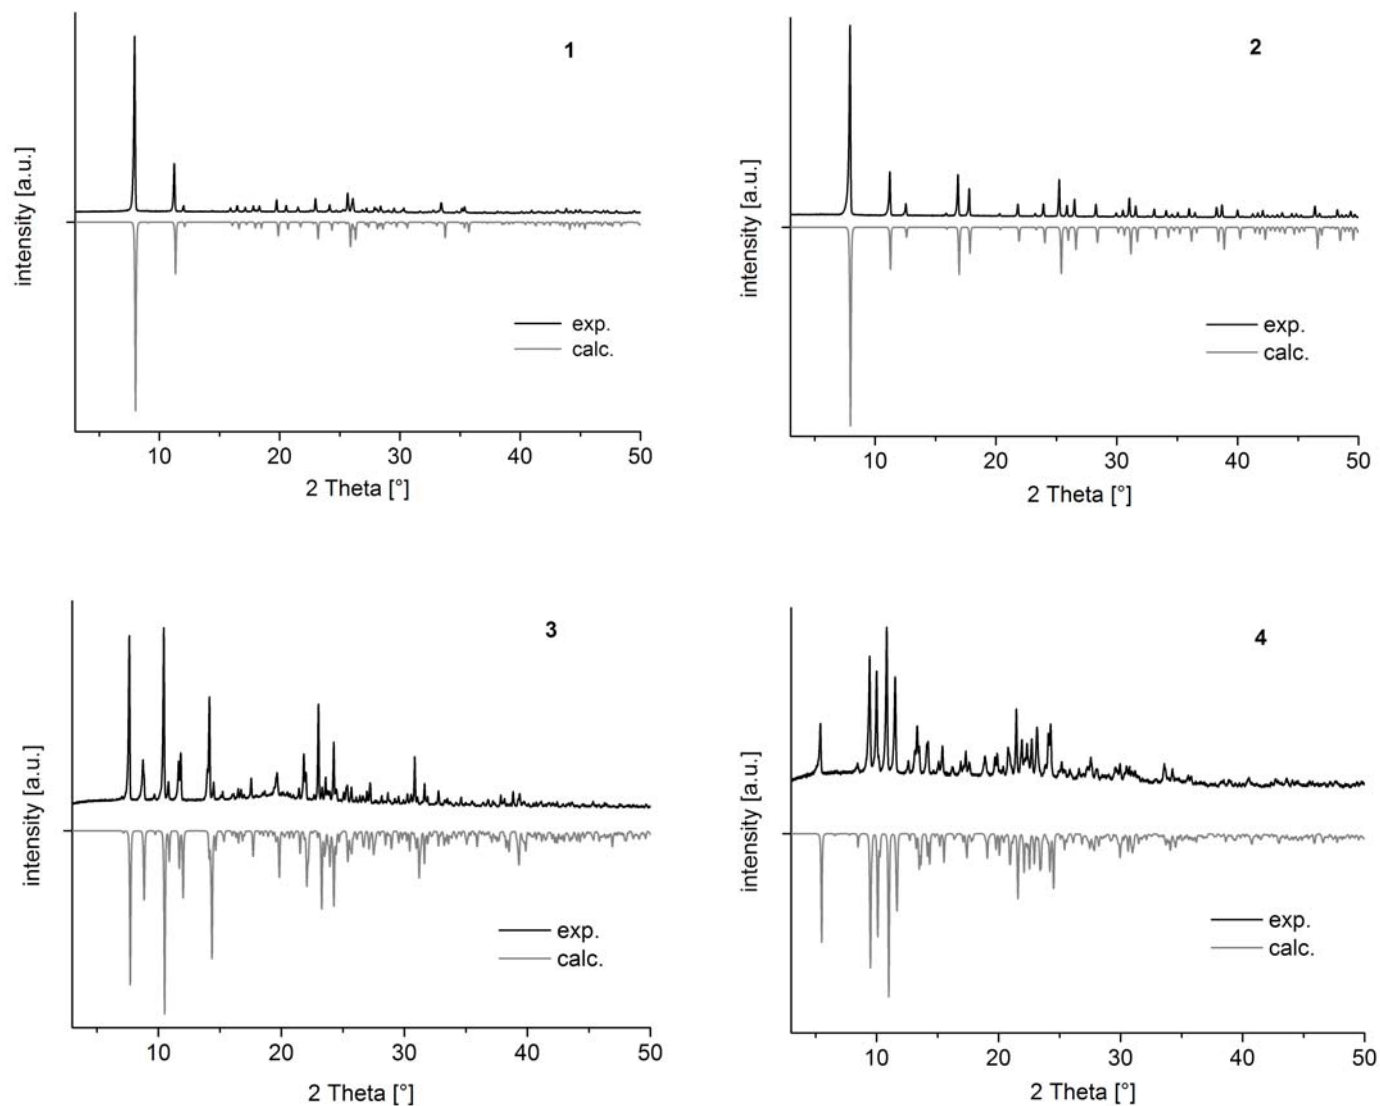

Figure S2. Measured (black) and simulated (grey) X-ray powder patterns of  $\infty^1[\text{Fe}(\text{SePh})_2]$

(**1**),  $\infty^1[\text{Fe}(\text{SeC}_6\text{H}_2(\text{CH}_3)_3)_2]$  (**2**),  $[\text{Fe}(\text{SePh})_2(1,10\text{-phen})_2]$  (**3**) and  $[\text{Fe}(\text{phen})_3][\text{Fe}(\text{SePh})_4]$  (**4**).

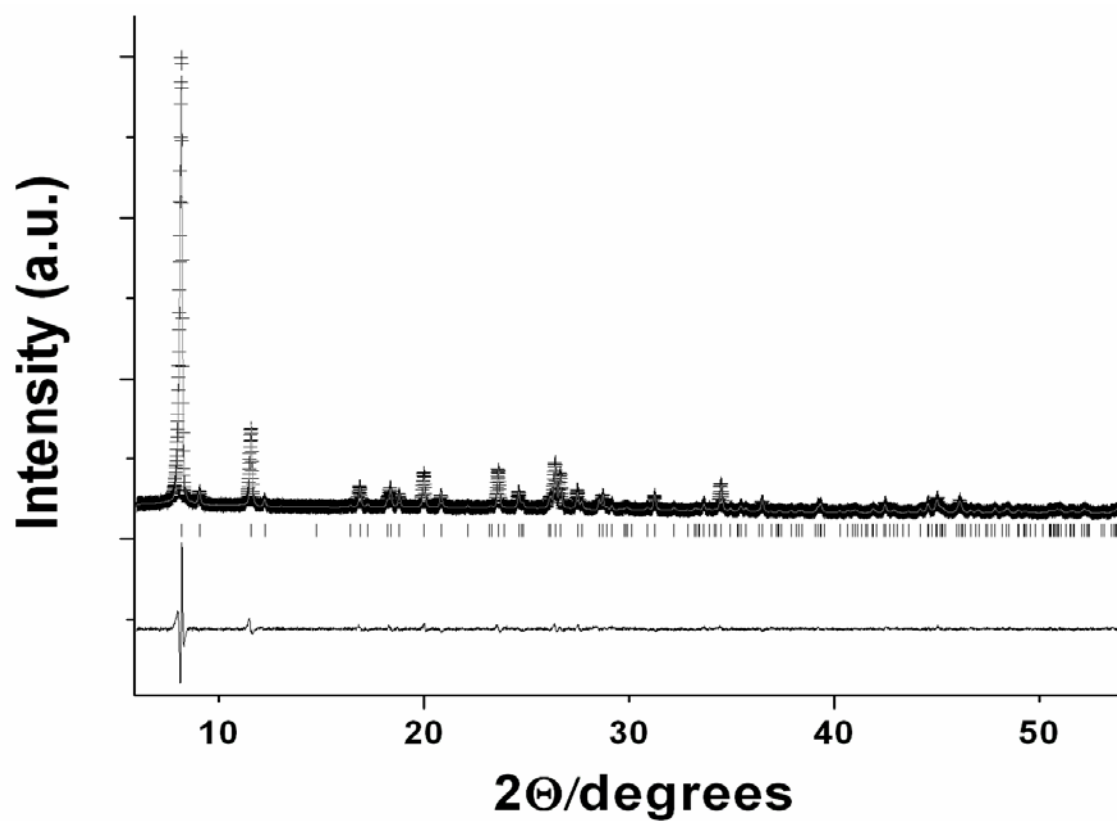

Figure S3. Rietveld refinement results for **1** after thermal treatment. Observed (cross symbols), calculated and difference profiles are present in figure. Weighted R value-Rw% is 4.48. Goodness of fit- $\chi^2$  is 2.04.

Table S1. Refined parameters for **1** after heat treatment. The space group number is  $I4_1/a$  (No. 88; setting 2). Cell parameters are  $a = b = 21.5799(4) \text{ \AA}$  and  $c = 10.9024(5) \text{ \AA}$ ;  $V = 5077.0 \text{ \AA}^3$ .

| Atom Label | Atom Type | X coordinate | Y coordinate | Z coordinate | Biso   | Occupancy |
|------------|-----------|--------------|--------------|--------------|--------|-----------|
| Se1        | Se        | 0.7656(5)    | 0.4118(3)    | 0.093(1)     | 4.3(4) | 1         |
| Se2        | Se        | 0.674(4)     | 0.5552(5)    | -0.034(1)    | 2.5(3) | 1         |
| Fe1        | Fe        | 0.7714(7)    | 0.5221(7)    | 0.029(1)     | 2.9(3) | 1         |
| C1         | C         | 0.8419       | 0.3846       | 0.0881       | 3.81   | 1         |
| C2         | C         | 0.8501       | 0.3571       | -0.0248      | 4.81   | 1         |
| H2         | H         | 0.8169       | 0.3522       | -0.0793      | 5.8    | 1         |
| C3         | C         | 0.907        | 0.3367       | -0.0574      | 6.4    | 1         |
| H3         | H         | 0.9126       | 0.3171       | -0.1342      | 7.7    | 1         |
| C4         | C         | 0.9551       | 0.3445       | 0.0193       | 6.8    | 1         |
| H4         | H         | 0.994        | 0.3303       | -0.004       | 8.1    | 1         |
| C5         | C         | 0.9472       | 0.3728       | 0.1302       | 7      | 1         |
| H5         | H         | 0.981        | 0.3789       | 0.1826       | 8.4    | 1         |
| C6         | C         | 0.8904       | 0.3927       | 0.1667       | 5.6    | 1         |
| H6         | H         | 0.8849       | 0.4114       | 0.2444       | 6.7    | 1         |
| C7         | C         | 0.6882       | 0.642        | 0.0183       | 4.3    | 1         |
| C8         | C         | 0.7031       | 0.6817       | -0.0763      | 5.18   | 1         |
| H8         | H         | 0.7085       | 0.6667       | -0.1574      | 6.2    | 1         |
| C9         | C         | 0.71         | 0.7427       | -0.0528      | 5.9    | 1         |
| H9         | H         | 0.7207       | 0.7696       | -0.1173      | 7      | 1         |
| C10        | C         | 0.7014       | 0.7648       | 0.0658       | 6.3    | 1         |
| H10        | H         | 0.7053       | 0.8068       | 0.0823       | 7.5    | 1         |
| C11        | C         | 0.6872       | 0.7253       | 0.1588       | 6.6    | 1         |
| H11        | H         | 0.6821       | 0.7402       | 0.24         | 7.9    | 1         |
| C12        | C         | 0.6801       | 0.6639       | 0.1356       | 5.59   | 1         |
| H12        | H         | 0.6698       | 0.6371       | 0.2005       | 6.7    | 1         |

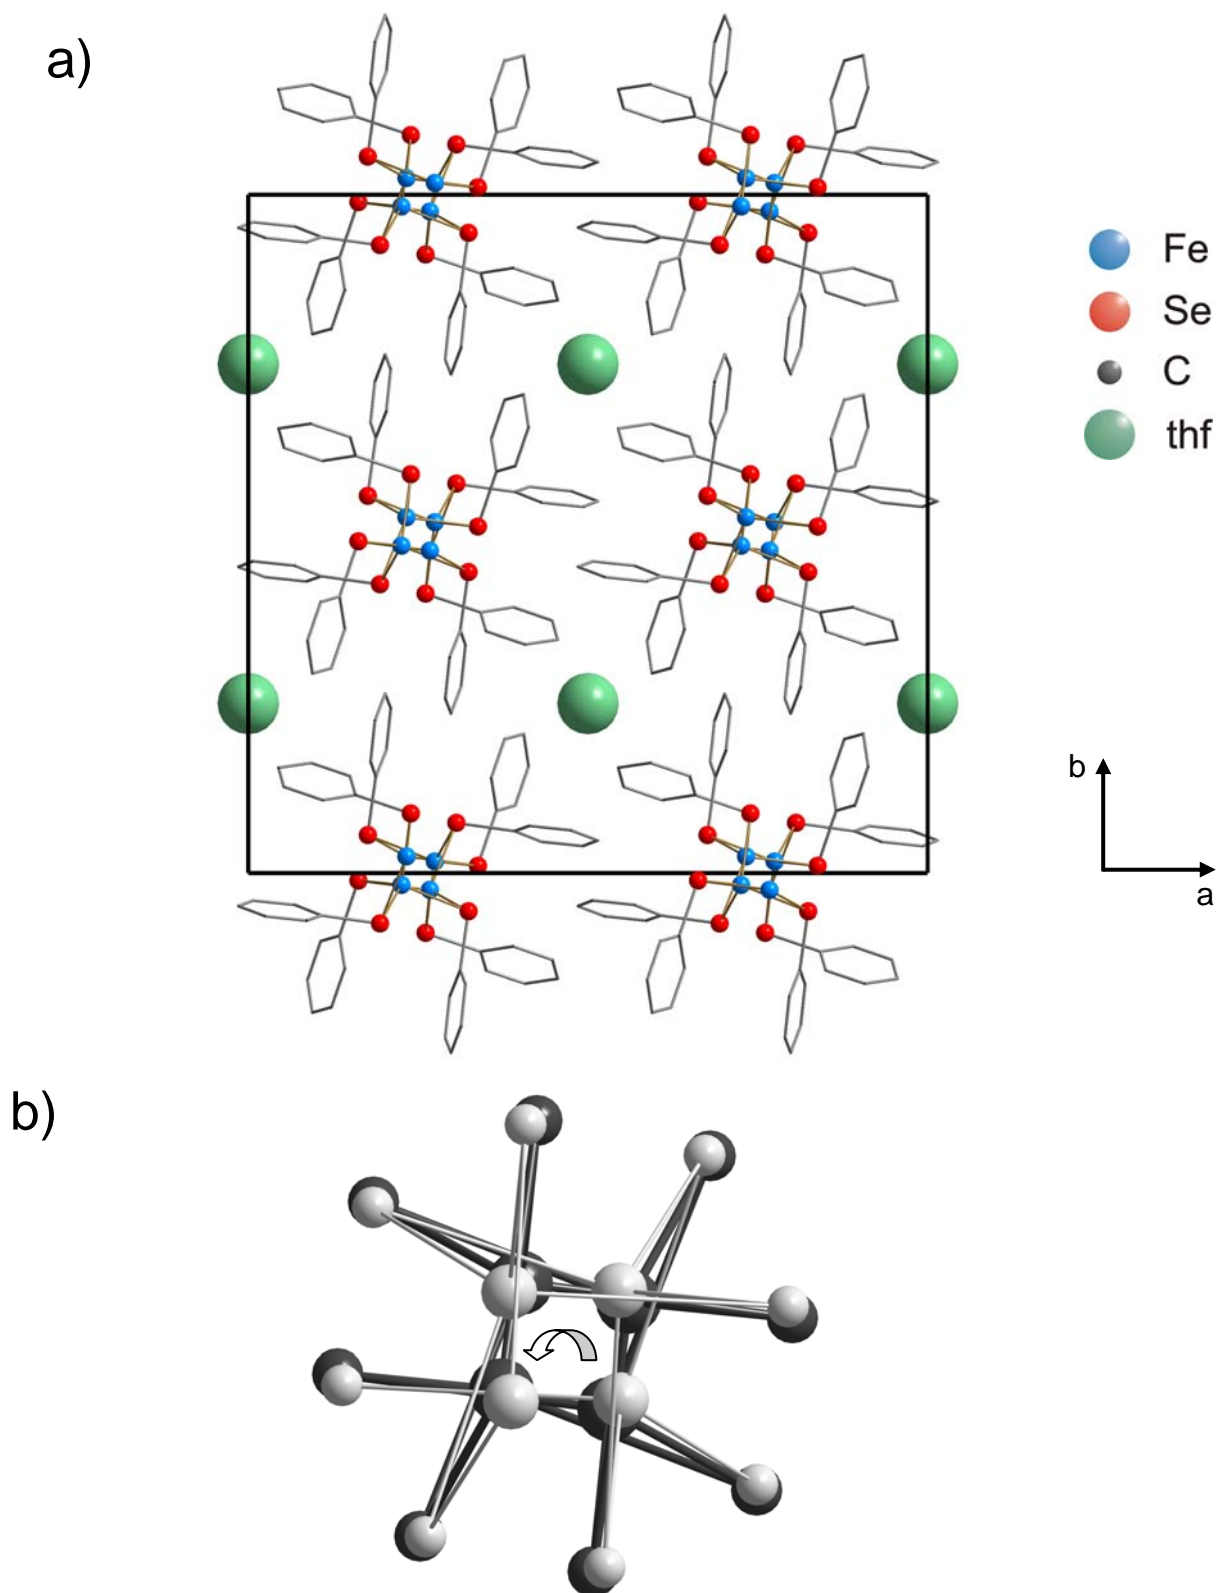

Figure S4. a) Structure of  $\infty$  [Fe(SePh)<sub>2</sub>] (**1**) in the crystal, view along *c*, location of the channels of disordered thf molecules are schematically indicated by the green balls; b) irreversible twist of the FeSe-chains in **1** before (black) and after (light grey) heating to 110 °C and cooling down.

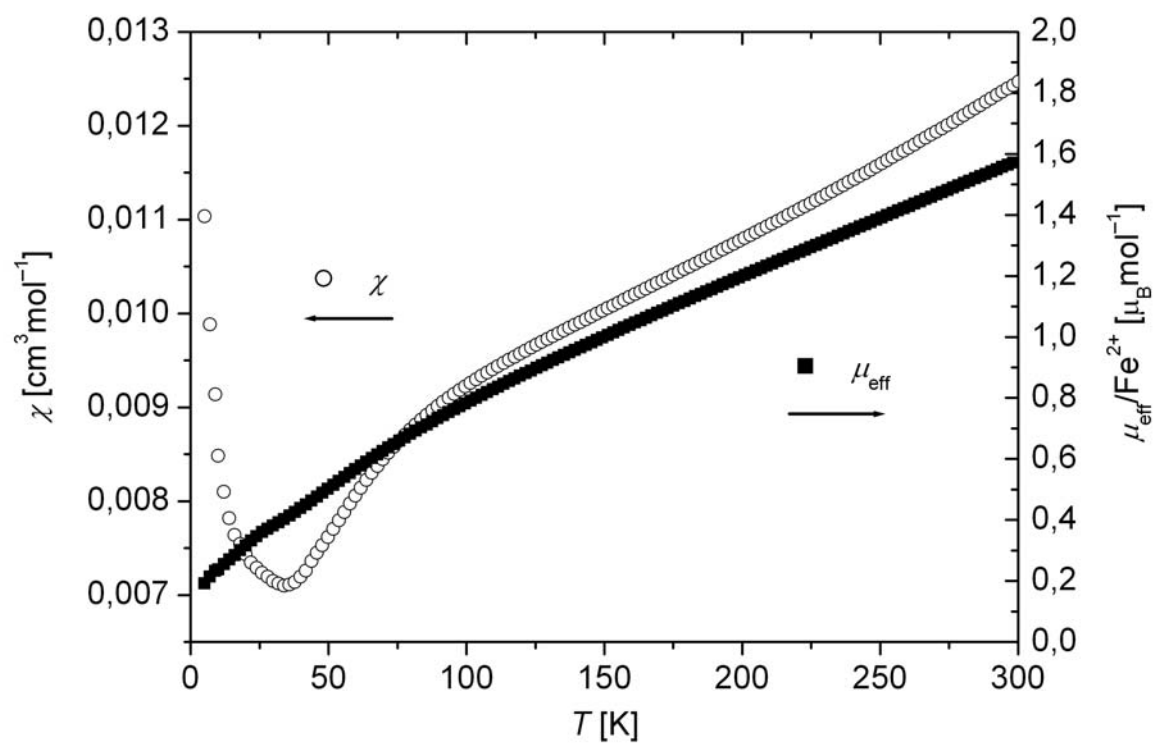

Figure S5. Susceptibility behaviour for  $[\text{Fe}(\text{SePh})_2]_{12}$ .

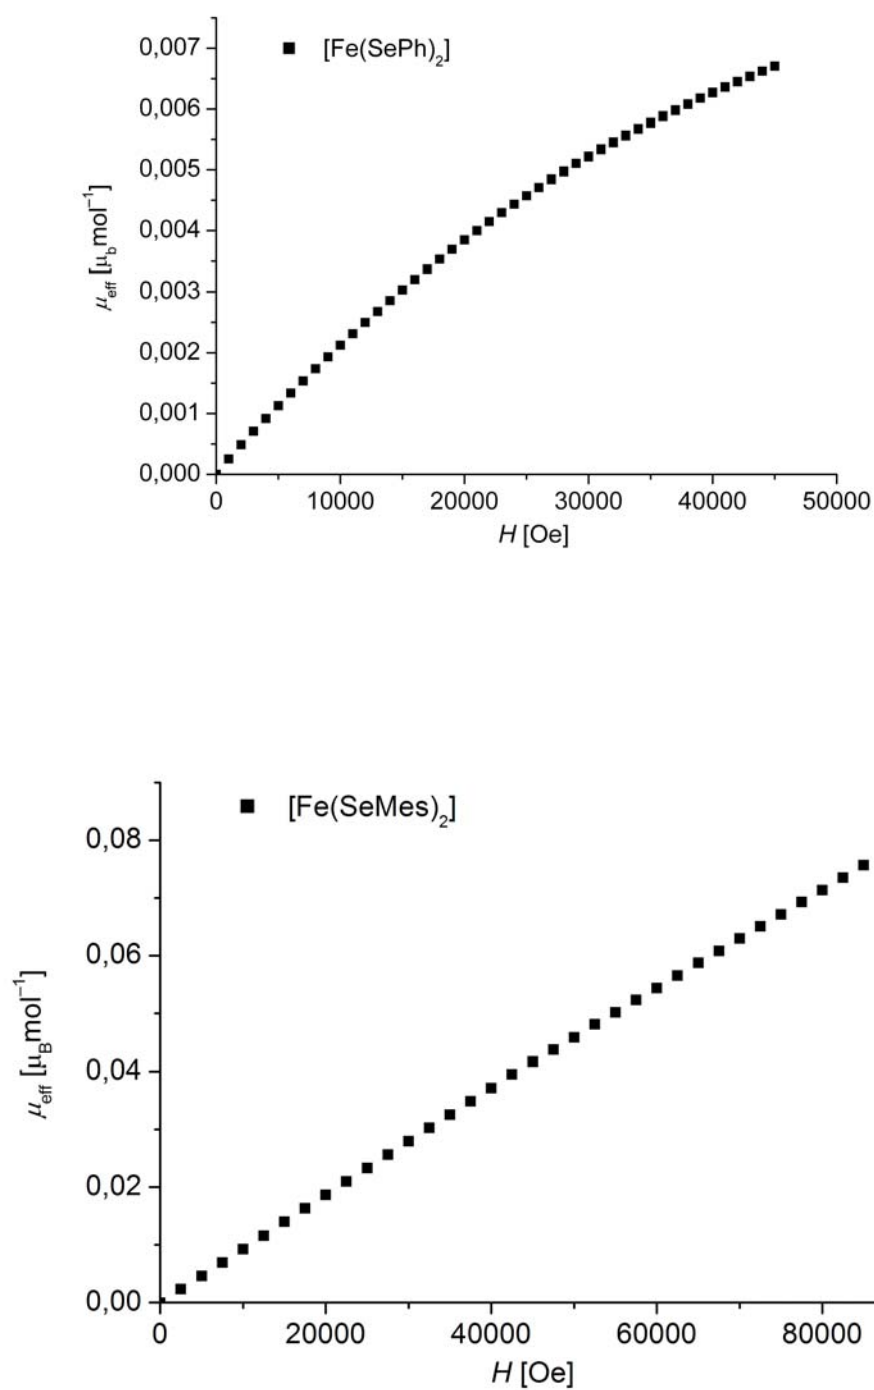

Figure S6. Isothermal magnetization curves of  $^1_\infty[\text{Fe}(\text{SePh})_2]$  (**1**) and  $^1_\infty[\text{Fe}(\text{SeC}_6\text{H}_2(\text{CH}_3)_3)_2]$  (**2**) at 5K.



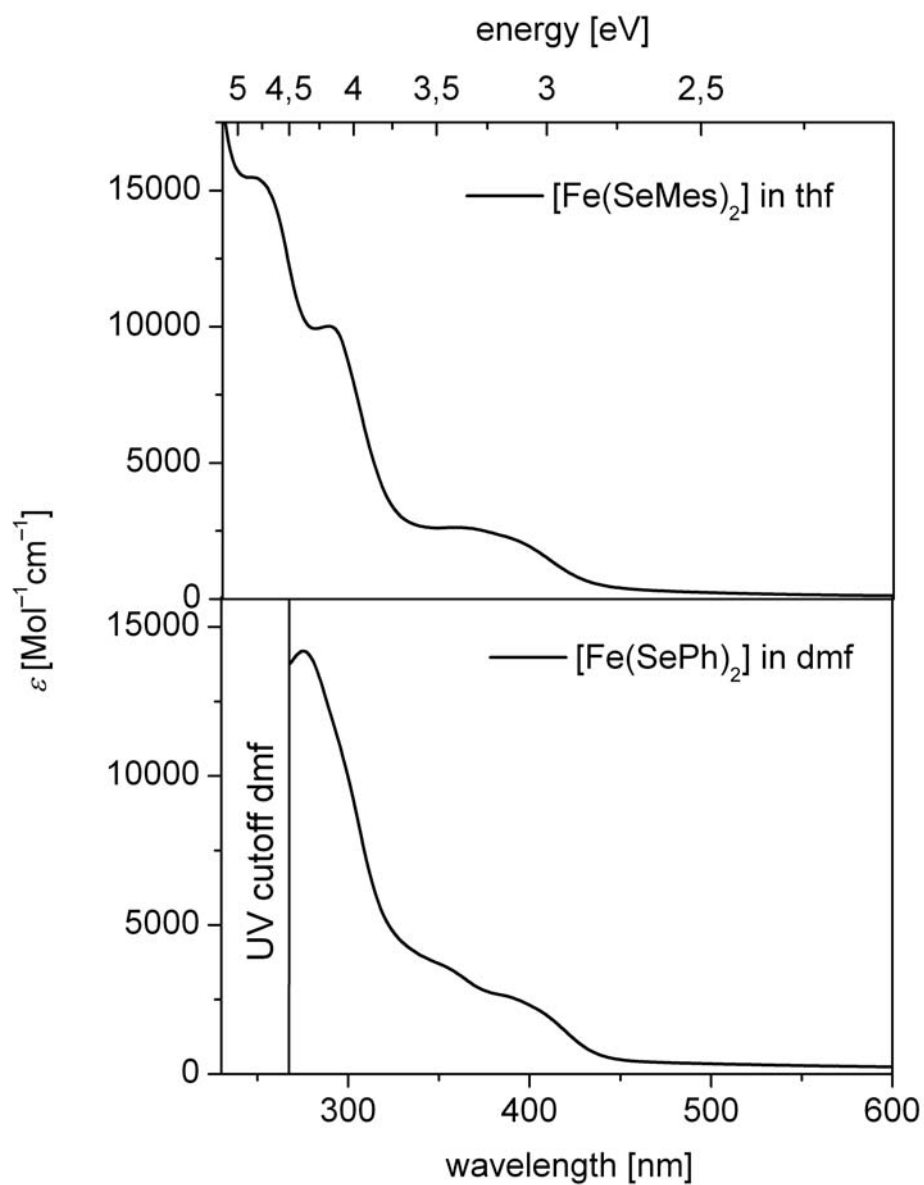

Figure S7. UV-Vis spectra of  $^1_\infty$ [Fe(SePh)<sub>2</sub>] (**1**) and  $^1_\infty$ [Fe(SeC<sub>6</sub>H<sub>2</sub>(CH<sub>3</sub>)<sub>3</sub>)<sub>2</sub>] (**2**) in solution.

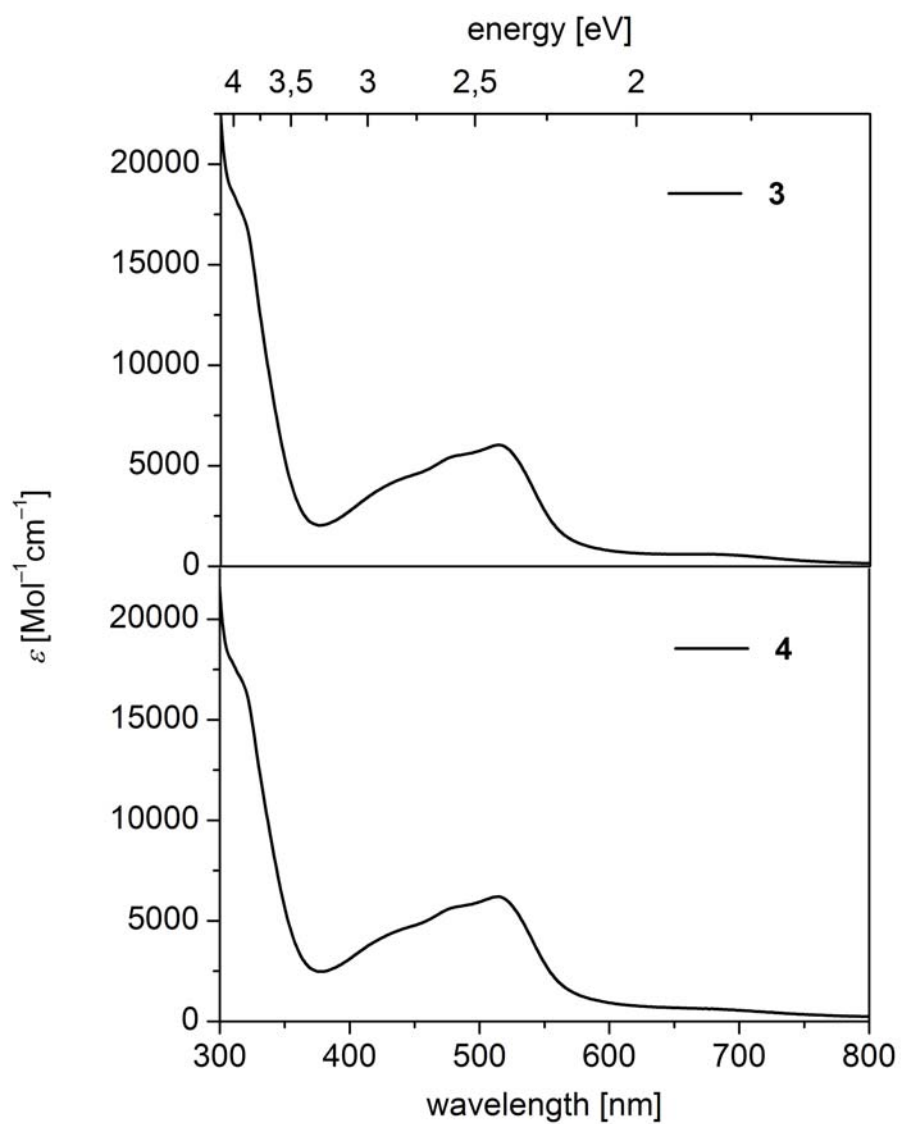

Figure S8. UV-Vis spectra of  $[\text{Fe}(\text{SePh})_2(1,10\text{-phen})_2]$  (**3**) and  $[\text{Fe}(\text{phen})_3][\text{Fe}(\text{SePh})_4]$  (**4**) in dmf.

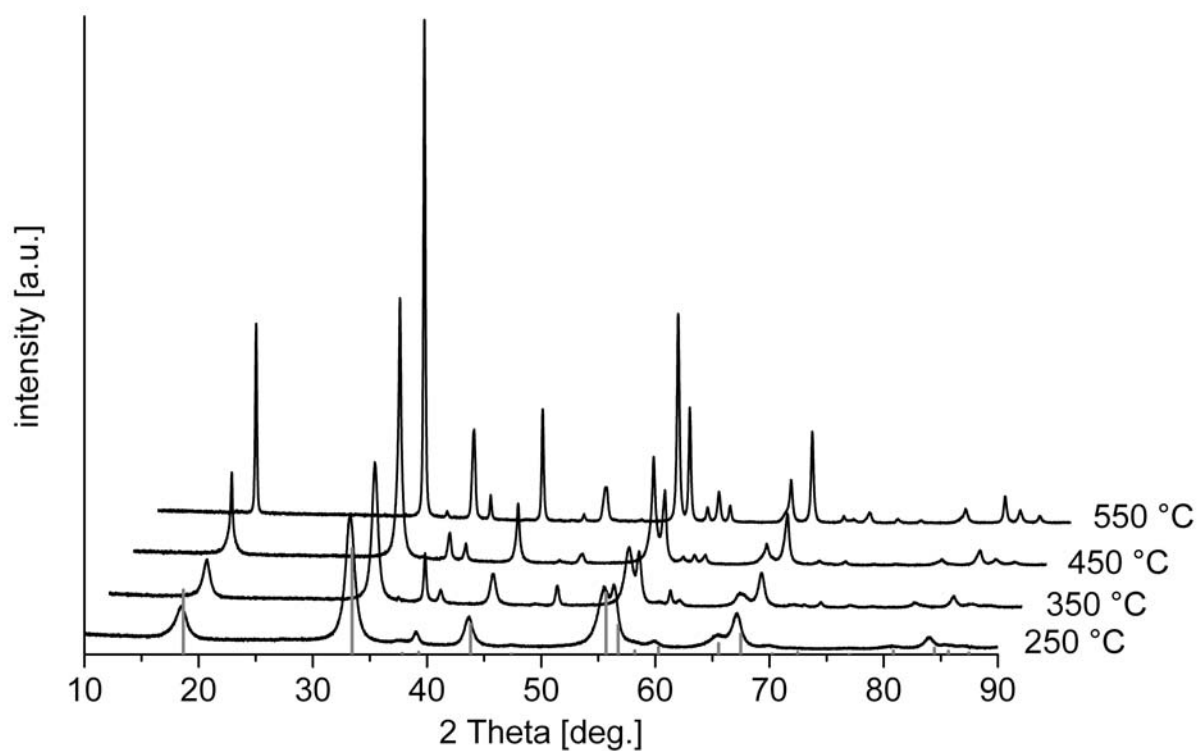

Figure S9. Powder XRD patterns of the residue of  $\frac{1}{\infty}[\text{Fe}(\text{SePh})_2]$  (**1**) after thermal treatment at 250, 350, 450 and 550 °C under vacuum ( $3 \cdot 10^{-6}$  mbar) compared to the indexed reflection patterns of tetragonal  $\text{Fe}_{1+x}\text{Se}$  ( $0.012 < x < 0.02$ ) <sup>[13]</sup> (grey lines).
